# Supplementary material
Source: PubMed Central journal article supplement (PMC7791144)
Supplement: mmc1.pdf [file mmc1.pdf]

**Supplemental Information**

**AAV9 Gene Therapy Increases Lifespan and Treats  
Pathological and Behavioral Abnormalities  
in a Mouse Model of CLN8-Batten Disease**

**Tyler B. Johnson, Katherine A. White, Jon J. Brudvig, Jacob T. Cain, Logan Langin, Melissa A. Pratt, Clarissa D. Booth, Derek J. Timm, Samantha S. Davis, Brandon Meyerink, Shibi Likhite, Kathrin Meyer, and Jill M. Weimer**



**Supplemental Table 1. Death and euthanasia descriptions.**

| Treatment Group                   | Sex | Age at Death | Morbidity Notes                                                                                           |
|-----------------------------------|-----|--------------|-----------------------------------------------------------------------------------------------------------|
| WT                                | F   | 16           | Found dead - likely intestinal tumor leading to rupture of blood vessel and internal hemorrhaging         |
| WT                                | F   | 17           | Euthanized - significantly underweight, labored breathing, lateral recumbancy, hunched                    |
| WT                                | F   | 18           | Euthanized - labored breathing; hunched                                                                   |
| WT                                | F   | 21           | Unknown                                                                                                   |
| WT                                | F   | 21           | Unknown                                                                                                   |
| WT                                | F   | 22           | Euthanized - labored breathing; moribund                                                                  |
| WT                                | F   | 22           | Euthanized – eye ulcer, unthrifty                                                                         |
| WT                                | F   | 23           | Euthanized – prolapsed rectum                                                                             |
| WT                                | F   | 23           | Euthanized – severe lesion on ear, distended abdomen                                                      |
| WT                                | F   | 23           | Euthanized – hunched, mass                                                                                |
| WT                                | F   | 24           | Euthanized – actively bleeding rectum                                                                     |
| WT                                | F   | 24           | n/a - retired from study                                                                                  |
| WT                                | F   | 24           | n/a - retired from study                                                                                  |
| WT                                | F   | 24           | n/a - retired from study                                                                                  |
| WT                                | F   | 24           | n/a - retired from study                                                                                  |
| WT                                | M   | 22           | Euthanized – ruptured abscess                                                                             |
| WT                                | M   | 22           | Euthanized – mass on tail, abscess in abdomen that drained, unthrifty                                     |
| WT                                | M   | 24           | Euthanized – labored breathing, abdominal mass                                                            |
| WT                                | M   | 24           | Euthanized – lesion due to ruptured abscess                                                               |
| WT                                | M   | 24           | Euthanized – distended abdomen, mass                                                                      |
| WT                                | M   | 24           | n/a - retired from study                                                                                  |
| WT                                | M   | 24           | n/a - retired from study                                                                                  |
| WT                                | M   | 24           | n/a - retired from study                                                                                  |
| WT                                | M   | 24           | n/a - retired from study                                                                                  |
| WT                                | M   | 24           | n/a - retired from study                                                                                  |
| WT                                | M   | 24           | n/a - retired from study                                                                                  |
| WT                                | M   | 24           | n/a - retired from study                                                                                  |
| WT                                | M   | 24           | n/a - retired from study                                                                                  |
| WT                                | M   | 24           | n/a - retired from study                                                                                  |
| WT                                | M   | 24           | n/a - retired from study                                                                                  |
| WT                                | M   | 24           | n/a - retired from study                                                                                  |
| <i>Cln8<sup>mynd</sup></i> + AAV9 | F   | 17           | Euthanized - prolapsed/bleeding rectum                                                                    |
| <i>Cln8<sup>mynd</sup></i> + AAV9 | F   | 18           | Euthanized - Significant growth appearing on lateral abdomen, emaciation, impaired movement due to growth |
| <i>Cln8<sup>mynd</sup></i> + AAV9 | F   | 19           | Unknown                                                                                                   |

|                                  |   |    |                                                          |
|----------------------------------|---|----|----------------------------------------------------------|
| <i>Cln8<sup>mnd</sup></i> + AAV9 | F | 21 | Euthanized – prolapsed rectum                            |
| <i>Cln8<sup>mnd</sup></i> + AAV9 | F | 22 | Euthanized – prolapsed rectum                            |
| <i>Cln8<sup>mnd</sup></i> + AAV9 | F | 22 | Euthanized – prolapsed rectum, masses in abdomen         |
| <i>Cln8<sup>mnd</sup></i> + AAV9 | F | 24 | Euthanized – hunched, labored breathing, bleeding rectum |
| <i>Cln8<sup>mnd</sup></i> + AAV9 | F | 24 | n/a - retired from study                                 |
| <i>Cln8<sup>mnd</sup></i> + AAV9 | F | 24 | n/a - retired from study                                 |
| <i>Cln8<sup>mnd</sup></i> + AAV9 | F | 24 | n/a - retired from study                                 |
| <i>Cln8<sup>mnd</sup></i> + AAV9 | F | 24 | n/a - retired from study                                 |
| <i>Cln8<sup>mnd</sup></i> + AAV9 | F | 24 | n/a - retired from study                                 |
| <i>Cln8<sup>mnd</sup></i> + AAV9 | F | 24 | n/a - retired from study                                 |
| <i>Cln8<sup>mnd</sup></i> + AAV9 | F | 24 | n/a - retired from study                                 |
| <i>Cln8<sup>mnd</sup></i> + AAV9 | F | 24 | n/a - retired from study                                 |
| <i>Cln8<sup>mnd</sup></i> + AAV9 | M | 21 | Unknown                                                  |
| <i>Cln8<sup>mnd</sup></i> + AAV9 | M | 22 | Unknown                                                  |
| <i>Cln8<sup>mnd</sup></i> + AAV9 | M | 23 | Euthanized – abscess in abdomen                          |
| <i>Cln8<sup>mnd</sup></i> + AAV9 | M | 23 | Euthanized - abdominal mass; mobility issues             |
| <i>Cln8<sup>mnd</sup></i> + AAV9 | M | 23 | Euthanized - abdominal mass                              |
| <i>Cln8<sup>mnd</sup></i> + AAV9 | M | 24 | Euthanized - abdominal mass, labored breathing           |
| <i>Cln8<sup>mnd</sup></i> + AAV9 | M | 24 | Euthanized - abdominal mass                              |
| <i>Cln8<sup>mnd</sup></i> + AAV9 | M | 24 | n/a - retired from study                                 |
| <i>Cln8<sup>mnd</sup></i> + AAV9 | M | 24 | n/a - retired from study                                 |
| <i>Cln8<sup>mnd</sup></i> + AAV9 | M | 24 | n/a - retired from study                                 |
| <i>Cln8<sup>mnd</sup></i> + AAV9 | M | 24 | n/a - retired from study                                 |
| <i>Cln8<sup>mnd</sup></i> + AAV9 | M | 24 | n/a - retired from study                                 |
| <i>Cln8<sup>mnd</sup></i> + AAV9 | M | 24 | n/a - retired from study                                 |
| <i>Cln8<sup>mnd</sup></i> + AAV9 | M | 24 | n/a - retired from study                                 |
| <i>Cln8<sup>mnd</sup></i> + AAV9 | M | 24 | n/a - retired from study                                 |
| <i>Cln8<sup>mnd</sup></i>        | F | 7  | Euthanized - severe ulcerative dermatitis                |
| <i>Cln8<sup>mnd</sup></i>        | F | 9  | Euthanized - seizures, severely impaired ambulation      |
| <i>Cln8<sup>mnd</sup></i>        | F | 9  | Euthanized - seizures, severely impaired ambulation      |
| <i>Cln8<sup>mnd</sup></i>        | F | 9  | Found dead                                               |
| <i>Cln8<sup>mnd</sup></i>        | F | 9  | Euthanized - extreme weight loss                         |
| <i>Cln8<sup>mnd</sup></i>        | F | 9  | Euthanized - humane end point                            |
| <i>Cln8<sup>mnd</sup></i>        | F | 9  | Found dead                                               |

|                           |   |    |                                                                                             |
|---------------------------|---|----|---------------------------------------------------------------------------------------------|
| <i>Cln8<sup>mnd</sup></i> | F | 10 | Found dead                                                                                  |
| <i>Cln8<sup>mnd</sup></i> | F | 10 | Euthanized - did not recover from severe seizures                                           |
| <i>Cln8<sup>mnd</sup></i> | F | 10 | Found dead                                                                                  |
| <i>Cln8<sup>mnd</sup></i> | F | 10 | Euthanized - ataxia, inability to right from back, weight loss, little control of back legs |
| <i>Cln8<sup>mnd</sup></i> | F | 10 | Found dead                                                                                  |
| <i>Cln8<sup>mnd</sup></i> | F | 10 | Euthanized - humane end point                                                               |
| <i>Cln8<sup>mnd</sup></i> | F | 11 | Euthanized - ataxia, significant weight loss, extreme difficulty in movement                |
| <i>Cln8<sup>mnd</sup></i> | M | 9  | Found dead                                                                                  |
| <i>Cln8<sup>mnd</sup></i> | M | 9  | Found dead                                                                                  |
| <i>Cln8<sup>mnd</sup></i> | M | 9  | Euthanized - seizures, severely impaired ambulation                                         |
| <i>Cln8<sup>mnd</sup></i> | M | 9  | Found dead                                                                                  |
| <i>Cln8<sup>mnd</sup></i> | M | 10 | Euthanized - humane end point                                                               |
| <i>Cln8<sup>mnd</sup></i> | M | 10 | Found dead                                                                                  |
| <i>Cln8<sup>mnd</sup></i> | M | 10 | Found dead                                                                                  |
| <i>Cln8<sup>mnd</sup></i> | M | 10 | Euthanized - humane end point                                                               |
| <i>Cln8<sup>mnd</sup></i> | M | 10 | Euthanized - humane end point                                                               |
| <i>Cln8<sup>mnd</sup></i> | M | 10 | Euthanized - humane end point                                                               |
| <i>Cln8<sup>mnd</sup></i> | M | 10 | Euthanized - humane end point                                                               |
| <i>Cln8<sup>mnd</sup></i> | M | 10 | Euthanized - ataxia, difficulty getting food and water, dropping weight, rough coat         |
| <i>Cln8<sup>mnd</sup></i> | M | 11 | Euthanized - unable to right itself, twitchy and hunched appearance                         |
| <i>Cln8<sup>mnd</sup></i> | M | 12 | Euthanized - humane end point                                                               |
| <i>Cln8<sup>mnd</sup></i> | M | 12 | Euthanized - hunched rough coat, priapism, general dyskinesia                               |
| <i>Cln8<sup>mnd</sup></i> | M | 12 | Euthanized - hunched rough coat, priapism, general dyskinesia                               |

Supplemental Table 2. Detailed Ns.

| N = # of Animals |                 | WT |   |   |   |    |    |    |    | <i>Cln8<sup>mnd</sup></i> |   |   |   |    |    |    |    | <i>Cln8<sup>mnd</sup></i> + AAV9 |   |   |   |    |    |    |    |
|------------------|-----------------|----|---|---|---|----|----|----|----|---------------------------|---|---|---|----|----|----|----|----------------------------------|---|---|---|----|----|----|----|
| Age (Months)     |                 | 2  | 4 | 6 | 8 | 10 | 12 | 18 | 24 | 2                         | 4 | 6 | 8 | 10 | 12 | 18 | 24 | 2                                | 4 | 6 | 8 | 10 | 12 | 18 | 24 |
| qPCR             | Cerebral Cortex | 4  | 5 | 6 | 5 | 6  | 5  | 4  | 6  | 5                         | 6 | 4 | 5 | -  | -  | -  | -  | 7                                | 6 | 5 | 6 | 7  | 6  | 5  | 5  |
|                  | Cervical SC     | 3  | 6 | 6 | 6 | 6  | 5  | 5  | 5  | 5                         | 6 | 5 | 6 | -  | -  | -  | -  | 5                                | 6 | 5 | 5 | 4  | 6  | 6  | 6  |
|                  | Thoracic SC     | 1  | 6 | 6 | 6 | 6  | 6  | 4  | 6  | 1                         | 5 | 5 | 6 | -  | -  | -  | -  | 1                                | 5 | 5 | 5 | 7  | 5  | 6  | 6  |
|                  | Lumbar SC       | 3  | 6 | 6 | 4 | 6  | 6  | 3  | 5  | 2                         | 6 | 5 | 3 | -  | -  | -  | -  | 2                                | 6 | 5 | 4 | 6  | 6  | 5  | 6  |
|                  | Kidney          | 4  | 6 | 5 | 3 | 6  | 4  | 5  | 4  | 4                         | 5 | 5 | 4 | -  | -  | -  | -  | 4                                | 6 | 4 | 6 | 7  | 5  | 7  | 6  |

| N = # of Images |         | WT |    |    |    |    |    |    |    | <i>Cln8<sup>mnd</sup></i> |    |    |    |    |    |    |    | <i>Cln8<sup>mnd</sup></i> + AAV9 |    |    |    |    |    |    |    |
|-----------------|---------|----|----|----|----|----|----|----|----|---------------------------|----|----|----|----|----|----|----|----------------------------------|----|----|----|----|----|----|----|
| Age (Months)    |         | 2  | 4  | 6  | 8  | 10 | 12 | 18 | 24 | 2                         | 4  | 6  | 8  | 10 | 12 | 18 | 24 | 2                                | 4  | 6  | 8  | 10 | 12 | 18 | 24 |
| ASM             | S1BF    | 8  | 20 | 44 | 41 | 33 | 24 | 28 | 44 | 20                        | 22 | 48 | 44 | -  | -  | -  | -  | 21                               | 21 | 47 | 45 | 53 | 20 | 32 | 40 |
|                 | VPM/VPL | 8  | 19 | 47 | 43 | 33 | 24 | 32 | 48 | 20                        | 24 | 47 | 48 | -  | -  | -  | -  | 24                               | 18 | 48 | 41 | 55 | 20 | 32 | 40 |
| SubC            | S1BF    | 33 | 54 | 68 | 57 | 37 | 43 | 42 | 52 | 24                        | 41 | 68 | 72 | -  | -  | -  | -  | 35                               | 33 | 69 | 64 | 50 | 66 | 68 | 72 |
|                 | VPM/VPL | 35 | 52 | 69 | 56 | 42 | 38 | 38 | 61 | 15                        | 44 | 68 | 72 | -  | -  | -  | -  | 26                               | 32 | 62 | 66 | 56 | 67 | 68 | 62 |
| GFAP            | S1BF    | 48 | 50 | 63 | 62 | 60 | 60 | 45 | 68 | 38                        | 51 | 72 | 72 | -  | -  | -  | -  | 40                               | 48 | 69 | 68 | 36 | 72 | 68 | 72 |
|                 | VPM/VPL | 46 | 50 | 68 | 63 | 58 | 58 | 46 | 62 | 39                        | 48 | 64 | 72 | -  | -  | -  | -  | 35                               | 48 | 69 | 68 | 36 | 66 | 72 | 68 |
| CD68            | S1BF    | 54 | 53 | 69 | 72 | 46 | 57 | 48 | 63 | 51                        | 34 | 72 | 72 | -  | -  | -  | -  | 45                               | 24 | 68 | 68 | 56 | 68 | 62 | 65 |
|                 | VPM/VPL | 54 | 54 | 70 | 72 | 48 | 57 | 48 | 68 | 45                        | 33 | 63 | 72 | -  | -  | -  | -  | 42                               | 27 | 72 | 68 | 60 | 67 | 68 | 60 |

| N = # of Animals |               | WT |    |    |    |    |    |    |    | <i>Cln8<sup>mnd</sup></i> |    |    |    |    |    |    |    | <i>Cln8<sup>mnd</sup></i> + AAV9 |    |    |    |    |    |    |    |
|------------------|---------------|----|----|----|----|----|----|----|----|---------------------------|----|----|----|----|----|----|----|----------------------------------|----|----|----|----|----|----|----|
| Age (Months)     |               | 2  | 4  | 6  | 8  | 10 | 12 | 18 | 24 | 2                         | 4  | 6  | 8  | 10 | 12 | 18 | 24 | 2                                | 4  | 6  | 8  | 10 | 12 | 18 | 24 |
| Pole Climb       | Rotarod       | 20 | 20 | 19 | 20 | 20 | 20 | 19 | 11 | 21                        | 21 | 20 | 20 | 5  | -  | -  | -  | 20                               | 20 | 20 | 20 | 20 | 20 | 20 | 11 |
|                  | Down          | 20 | 19 | 20 | 19 | 20 | 20 | 19 | 11 | 18                        | 18 | 19 | 17 | 9  | -  | -  | -  | 18                               | 18 | 20 | 20 | 20 | 20 | 19 | 12 |
|                  | Turn          | 20 | 20 | 20 | 20 | 20 | 20 | 18 | 11 | 20                        | 20 | 20 | 19 | 8  | -  | -  | -  | 20                               | 20 | 18 | 18 | 20 | 20 | 19 | 12 |
|                  | Falls         | 20 | 20 | 20 | 20 | 20 | 20 | 19 | 11 | 21                        | 21 | 20 | 20 | 8  | -  | -  | -  | 20                               | 20 | 19 | 20 | 20 | 20 | 19 | 12 |
| Water Maze       | Time          | 19 | 19 | 20 | 19 | 19 | 20 | 19 | 10 | 15                        | 15 | 16 | 10 | -  | -  | -  | -  | 15                               | 15 | 15 | 15 | 12 | 10 | 9  | 6  |
|                  | Speed         | 20 | 20 | 20 | 20 | 20 | 20 | 19 | 10 | 17                        | 61 | 16 | 10 | -  | -  | -  | -  | 15                               | 14 | 15 | 14 | 12 | 10 | 9  | 6  |
|                  | Reversal Time | -  | -  | 18 | -  | -  | 20 | 19 | 9  | -                         | -  | 16 | -  | -  | -  | -  | -  | -                                | -  | 15 | -  | -  | 10 | 9  | 6  |

|              |                    |    |    |    |    |    |    |    |    |    |    |    |    |   |   |   |   |    |    |    |    |    |    |    |
|--------------|--------------------|----|----|----|----|----|----|----|----|----|----|----|----|---|---|---|---|----|----|----|----|----|----|----|
|              | Reversal Speed     | -  | -  | 20 | -  | -  | 20 | 18 | 10 | -  | -  | 16 | -  | - | - | - | - | -  | 15 | -  | -  | 10 | 9  | 6  |
| Coordination | Clasping           | 20 | 20 | 20 | 20 | 20 | 20 | 19 | 11 | 21 | 21 | 21 | 20 | 6 | - | - | - | 20 | 20 | 20 | 20 | 20 | 20 | 13 |
|              | Ledge              | 20 | 20 | 20 | 20 | 20 | 20 | 19 | 11 | 21 | 21 | 21 | 20 | 6 | - | - | - | 20 | 20 | 20 | 20 | 20 | 20 | 13 |
|              | Gait               | 20 | 20 | 20 | 20 | 20 | 20 | 19 | 11 | 21 | 21 | 21 | 20 | 6 | - | - | - | 20 | 20 | 20 | 20 | 20 | 20 | 13 |
|              | Combined Score     | 20 | 20 | 20 | 20 | 20 | 20 | 19 | 11 | 21 | 21 | 21 | 20 | 6 | - | - | - | 20 | 20 | 20 | 20 | 20 | 20 | 13 |
| Force Plate  | Male Weight        | 8  | 10 | 10 | 10 | 10 | 10 | 10 | 7  | 10 | 10 | 10 | 10 | 5 | - | - | - | 11 | 10 | 10 | 10 | 10 | 10 | 6  |
|              | Female Weight      | 10 | 10 | 10 | 10 | 10 | 10 | 9  | 4  | 10 | 11 | 11 | 10 | 1 | - | - | - | 9  | 9  | 10 | 10 | 10 | 10 | 6  |
|              | Total Distance     | 19 | 20 | 20 | 20 | 20 | 20 | 19 | 11 | 20 | 21 | 21 | 20 | 6 | - | - | - | 20 | 20 | 20 | 19 | 19 | 19 | 12 |
|              | Bouts Low Mobility | 19 | 20 | 20 | 20 | 20 | 20 | 19 | 11 | 20 | 21 | 21 | 20 | 6 | - | - | - | 20 | 20 | 20 | 20 | 20 | 20 | 12 |
|              | Total Area         | 19 | 20 | 20 | 20 | 19 | 20 | 19 | 11 | 20 | 21 | 21 | 19 | 6 | - | - | - | 20 | 20 | 20 | 18 | 19 | 19 | 12 |
|              | Focused Stereo     | 19 | 20 | 20 | 19 | 20 | 20 | 18 | 11 | 20 | 21 | 20 | 20 | 6 | - | - | - | 20 | 19 | 19 | 18 | 20 | 18 | 12 |
|              | Tremor 5-10Hz      | 20 | 20 | 20 | 20 | 20 | 20 | 19 | 11 | 21 | 21 | 21 | 20 | 6 | - | - | - | 20 | 20 | 20 | 20 | 20 | 20 | 12 |
|              | Tremor 10-15Hz     | 20 | 20 | 20 | 20 | 20 | 20 | 19 | 11 | 21 | 21 | 21 | 20 | 6 | - | - | - | 20 | 20 | 20 | 20 | 20 | 20 | 12 |
|              | Tremor 15-20Hz     | 20 | 20 | 20 | 20 | 20 | 20 | 19 | 11 | 21 | 21 | 21 | 20 | 6 | - | - | - | 20 | 20 | 20 | 20 | 20 | 20 | 12 |
|              | Tremor 20-25Hz     | 20 | 20 | 20 | 20 | 17 | 20 | 19 | 11 | 21 | 21 | 21 | 20 | 6 | - | - | - | 20 | 20 | 20 | 20 | 20 | 20 | 12 |
